# Supplementary material for: Using lean management approach in improving clinical team leader handover process: nursing services
Source: HighWire-hosted journal article supplement (doi:10.1136/bmjoq-2021-001375), 2021-09-01

| <b>Average Time-frame of Team Leader Handover Process among Nursing Nnits</b> |       |
|-------------------------------------------------------------------------------|-------|
| 1st Visit                                                                     | 54.5  |
| 2nd Visit                                                                     | 53.75 |
| 3rd Visit                                                                     | 49.25 |

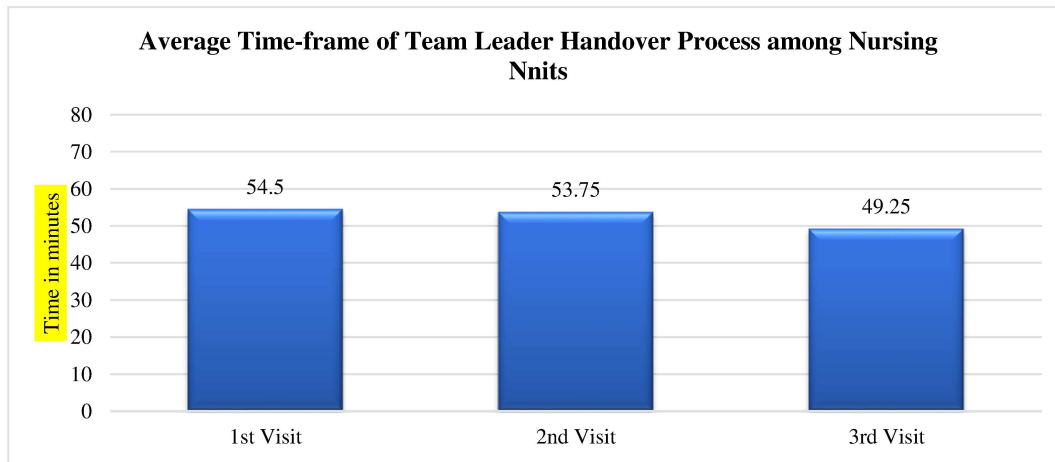

Supplement: bmjoq-2021-001375supp001_data_supplement.pdf [file bmjoq-2021-001375supp001_data_supplement.pdf]
